# Supplementary material for: Reciprocal expression of Slug and Snail in human oral cancer cells
Source: PubMed Central journal article supplement (PMC6029773; doi:10.1371/journal.pone.0199442), 2018-07-03

# S1 Fig. *SNAI1* and *SNAI2* expression in oral tongue squamous cell carcinoma.

A

GSE75538

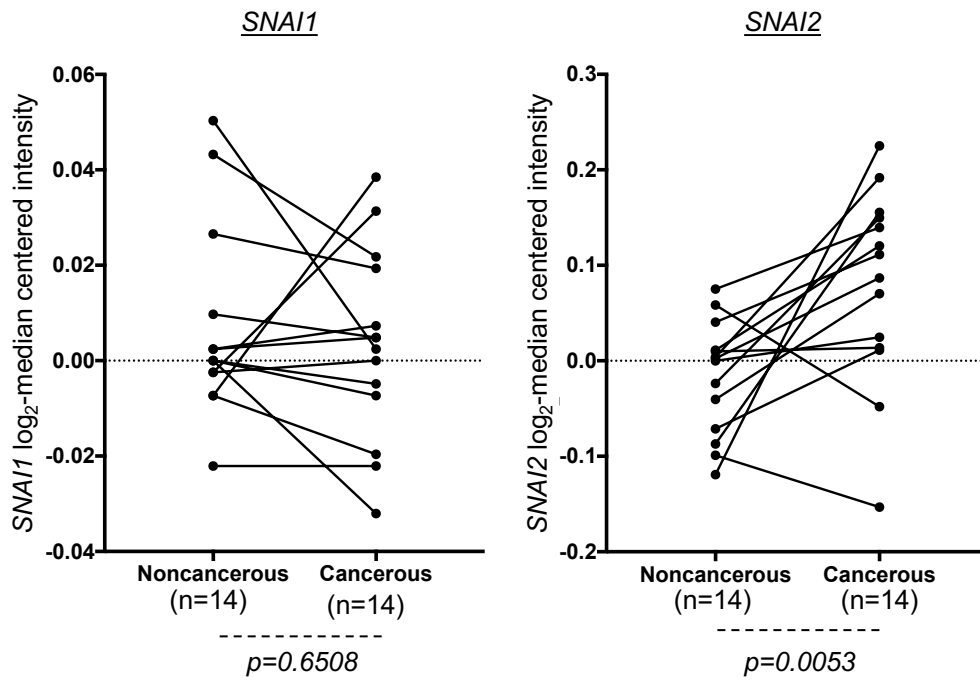

B

GSE75538

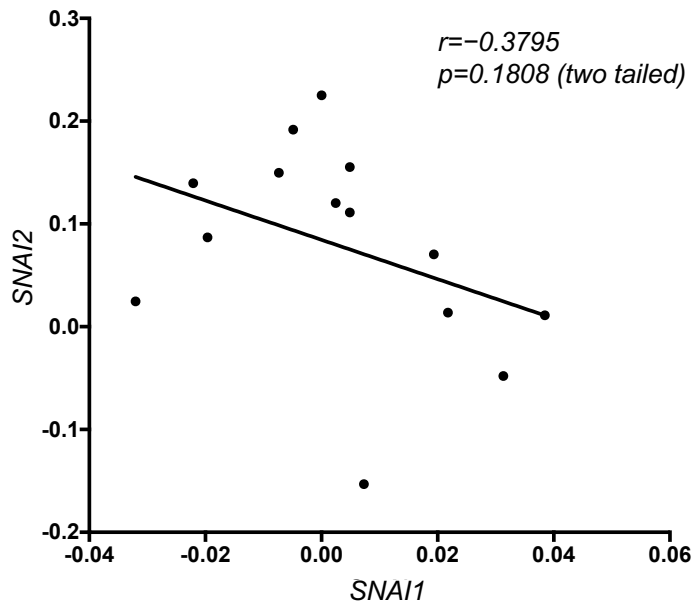

Supplement: pone.0199442.s001.pdf [file pone.0199442.s001.pdf]
