# Supplementary material for: Reciprocal expression of Slug and Snail in human oral cancer cells
Source: PubMed Central journal article supplement (PMC6029773; doi:10.1371/journal.pone.0199442), 2018-07-03

## S2 Fig. Slug and Snail expression in HOC313 and SAS cells.

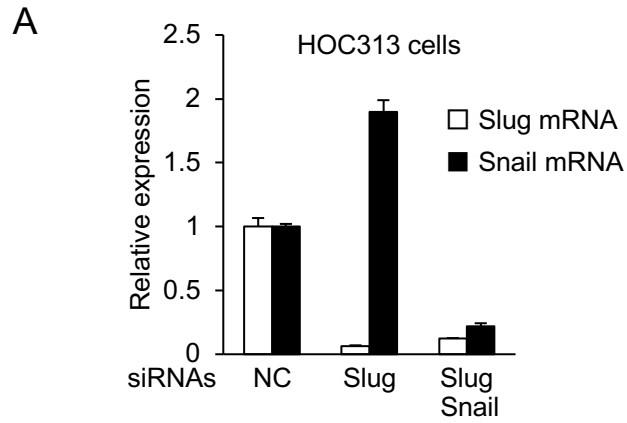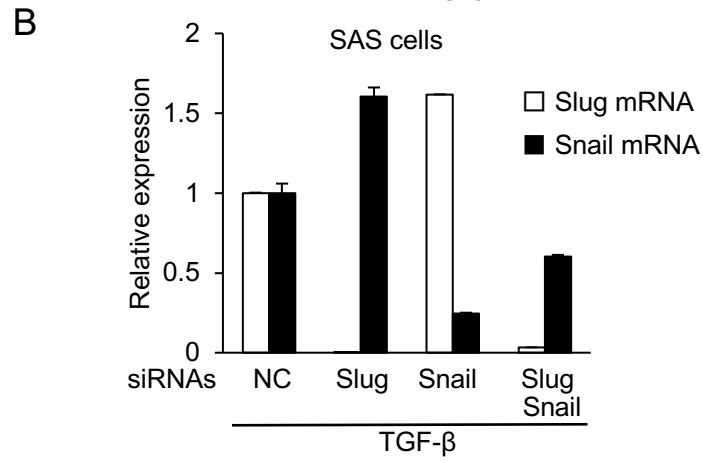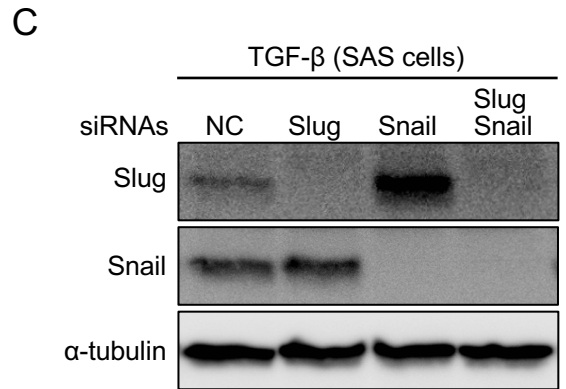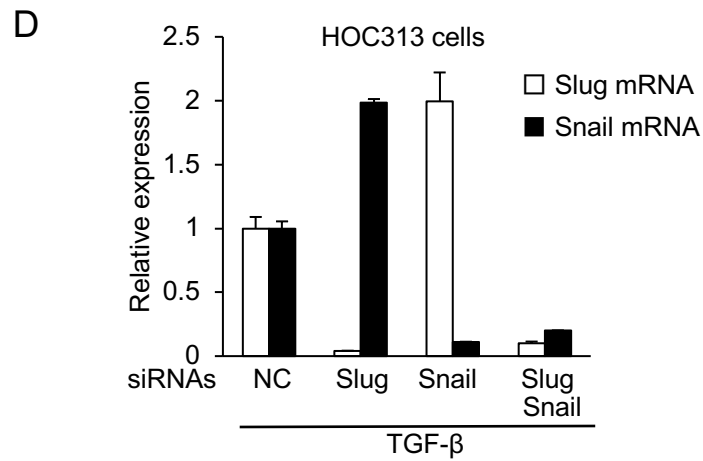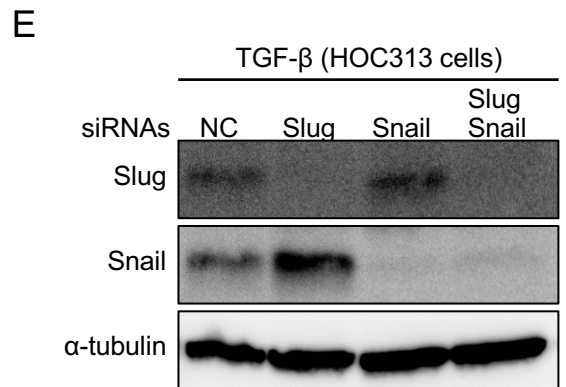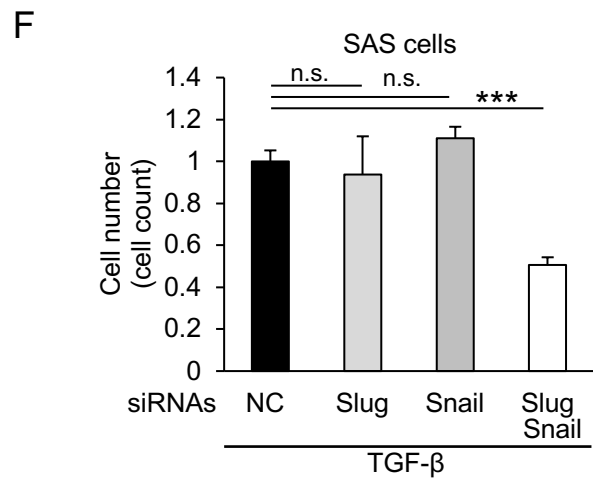

Supplement: pone.0199442.s002.pdf [file pone.0199442.s002.pdf]
